# Supplementary material for: Evaluation of SARS-CoV-2 antigen-based rapid diagnostic kits in Pakistan: formulation of COVID-19 national testing strategy.
Source: Research Square preprint supplement (doi:10.21203/rs.3.rs-113852/v2), 2021-01-26
Supplement: Supplementary file 1 [file ac3906e896c51cc3b2d4b222.xlsx]

## Sheet: Sheet1
Evaluation of COVID-19 Antigen Kits of Saliva and Nasal swab from Lepu medical & comparision with PCR results performed by Triple target USFDA approved kit from Seegene
S#	PIN	Age	Gender	PCR ct values (saliva)	Product 1 Salive test results	PCR ct values (nasal)	Product 2 Nasal swab results	sampling date
1	2010-01-007631	39	M	30,31,31	Not Detected	30,29,31	INVALID	2020-03-10
2	2010-01-008116	22	F	26,29,31	Not Detected	27,30,32	Detected	2020-03-10
3	2010-01-008548	58	M	28,27,26	Not Detected	26,29,27	Detected	2020-03-10
4	2010-01-008512	81	M	31,32,31	Weak Positive	30,31,30	INVALID	2020-03-10
5	2010-01-008180	78	F	29,30,29	Weak Positive	25,24,25	Detected	2020-03-10
6	2010-01-008586	62	F	25,26,24	Not Detected	33,32,32	INVALID	2020-03-10
7	2010-01-009185	45	M	30,32,33	Weak Positive	34,32,35	weak positive	2020-03-10
8	2010-01-008986	48	F	30,29,27	Not Detected	31,29,30	Detected	2020-03-10
9	2010-01-009355	29	F	24,25,24	Detected	31,29,30	Detected	2020-03-10
10	2010-01-009922	51	F	30,31,33	Not Detected	28,27,26	Not Detected	2020-03-10
11	2010-01-009918	26	F	27,26,25	Not Detected	30,31,32	Detected	2020-04-10
12	2010-01-011840	19	M	23,27,24	Not Detected	27,28,24	Detected	2020-04-10
13	2010-01-009626	31	M	29,30,32	Not Detected	24,23,21	Not Detected	2020-04-10
14	2010-01-015971	51	F	28,27,29	Not Detected	28,27,26	weak positive	2020-04-10
15	2010-01-017121	36	M	30,31,32	Not Detected	22,23,21	Not Detected	2020-04-10
16	2010-01-016762	42	F	27,28,24	Detected	27,28,24	Detected	2020-04-10
17	2010-01-016904	60	M	24,23,21	Not Detected	29,27,28	Detected	2020-04-10
18	2010-01-017348	68	M	28,27,26	Not Detected	30,29,27	Detected	2020-04-10
19	2010-01-017334	29	M	22,23,21	Not Detected	30,32,33	Detected	2020-04-10
20	2010-01-008159	76	M	27,28,24	Detected	30,29,27	Detected	2020-04-10
21	2010-01-008923	54	M	29,27,28	Not Detected	24,25,24	Not Detected	2020-04-10
22	2010-01-014386	59	M	30,29,27	Not Detected	30,31,33	Detected	2020-04-10
23	2010-01-014933	75	M	30,31,31	Not Detected	27,26,25	INVALID	2020-05-10
24	2010-01-011200	36	M	31,32,31	Not Detected	23,27,24	Weak Positive	2020-05-10
25	2010-01-020183	34	M	28,27,26	Not Detected	29,30,32	Detected	2020-05-10
26	2010-01-022174	52	M	25,24,23	Invalid	28,27,29	Not Detected	2020-05-10
27	2010-01-020432	41	M	19,18,18	Weak Positive	16,18,18	Detected	2020-05-10
28	2010-01-022117	54	M	22,23,21	Not Detected	25,24,25	Detected	2020-05-10
29	2010-01-029885	32	M	32,32,30	Invalid	33,32,32	Invalid	2020-05-10
30	2010-01-027316	21	M	29,30,31	Invalid	34,32,35	Not Detected	2020-05-10
31	2010-01-026062	34	M	21,16,18	Not Detected	31,29,30	Detected	2020-05-10
32	2010-01-033484	11	M	36,39,33	Invalid	31,29,30	Not Detected	2020-06-10
33	2010-01-035680	6	M	41,43,38	Not Detected	36,35,34	Not Detected	2020-06-10
34	2010-01-035688	66	F	25,24,25	Not Detected	27,27,24	Detected	2020-06-10
35	2010-01-034377	64	F	37,36,38	Invalid	36,34,33	Not Detected	2020-06-10
36	2010-01-035651	62	M	34,35,34	Detected	34,32,29	Not Detected	2020-06-10
37	2010-01-030608	45	M	25,24,25	Not Detected	29,29,25	Detected	2020-06-10
38	2010-01-026980	24	M	16,18,18	Detected	36,34,32	Detected	2020-06-10
39	2010-01-035674	80	M	25,24,25	Not Detected	33,32,32	Detected	2020-06-10
40	2010-01-033788	68	M	33,32,32	Not Detected	25,24,25	Not Detected	2020-06-10
41	2010-01-033692	38	M	34,32,35	Not Detected	36,39,33	Not Detected	2020-06-10
42	2010-01-034991	32	F	31,29,30	Not Detected	33,32,32	Not Detected	2020-06-10
43	2010-01-033202	36	M	37,35,34	Not Detected	33,32,32	Detected	2020-06-10
44	2010-01-034889	20	F	33,32,32	Not Detected	22,23,21	Not Detected	2020-06-10
45	2010-01-034216	46	M	25,24,25	Detected	27,28,24	Not Detected	2020-06-10
46	2010-01-034270	47	M	36,39,33	Not Detected	29,29,25	Not Detected	2020-07-10
47	2010-01-029832	70	M	33,32,32	Not Detected	33,32,32	Not Detected	2020-07-10
48	2010-01-032258	50	F	27,27,28	Not Detected	37,35,34	Detected	2020-07-10
49	2010-01-041791	29	F	29,30,30	Not Detected	33,32,32	Detected	2020-07-10
50	2010-01-041798	63	F	22,21,20	Detected	25,24,25	Not Detected	2020-07-10
51	2010-01-047437	42	M	36,35,34	Not Detected	36,39,33	Detected	2020-07-10
52	2010-01-046782	68	F	32,33,27	Not Detected	33,32,32	Not Detected	2020-07-10
53	2010-01-045908	38	M	28,28,26	Not Detected	36,34,33	Not Detected	2020-07-10
54	2010-01-047555	65	F	35,33,30	Not Detected	34,32,29	Not Detected	2020-07-10
55	2010-01-045927	23	F	36,35,32	Not Detected	29,29,25	Not Detected	2020-07-10
56	2010-01-045921	58	F	27,27,24	Detected	29,30,31	Not Detected	2020-07-10
57	2010-01-048297	47	M	36,34,33	Not Detected	22,23,21	Not Detected	2020-07-10
58	2010-01-048003	76	M	34,32,29	Not Detected	27,28,24	Not Detected	2020-07-10
59	2010-01-047970	72	F	29,29,25	Not Detected	29,29,25	Not Detected	2020-08-10
60	2010-01-047981	27	M	36,34,32	Not Detected	25,24,25	Not Detected	2020-08-10
61	2010-01-048171	27	M	32,32,30	Not Detected	36,39,33	Not Detected	2020-08-10
62	2010-01-027497	47	M	29,30,31	Not Detected	28,28,26	Detected	2020-08-10
63	2010-01-029832	34	M	21,16,18	Not Detected	29,30,31	Not Detected	2020-08-10
64	2010-01-034515	20	F	36,39,33	Not Detected	29,30,31	Not Detected	2020-08-10
65	2010-01-038253	38	F	24,23,21	Not Detected	21,16,18	Detected	2020-08-10
66	2010-01-037203	56	M	28,27,26	Not Detected	36,39,33	Detected	2020-08-10
67	2010-01-033766	25	F	22,23,21	Not Detected	21,16,18	Not Detected	2020-08-10
68	2010-01-038443	15	M	27,28,24	Not Detected	28,27,26	Detected	2020-08-10
69	2010-01-040726	43	M	28,27,26	Detected	22,23,21	Detected	2020-08-10
70	2010-01-040595	31	M	31,32,31	Not Detected	27,28,24	Detected	2020-08-10
71	2010-01-042730	43	M	29,30,29	Not Detected	29,29,25	Detected	2020-08-10
72	2010-01-041828	39	M	25,26,24	Not Detected	28,27,26	Detected	2020-08-10
73	2010-01-039116	26	M	30,32,33	Not Detected	21,16,18	Detected	2020-08-10
74	2010-01-041786	54	M	27,28,24	Not Detected	36,39,33	Not Detected	2020-09-10
75	2010-01-044843	52	M	36,34,33	Not Detected	28,28,26	Not Detected	2020-09-10
76	2010-01-042568	54	F	34,32,29	Not Detected	35,33,30	Detected	2020-09-10
77	2010-01-046357	68	M	29,29,25	Detected	36,35,32	Detected	2020-09-10
78	2010-01-045516	58	M	29,30,31	Not Detected	28,27,26	Not Detected	2020-09-10
79	2010-01-041402	72	F	21,16,18	Detected	22,23,21	Detected	2020-09-10
80	2010-01-046871	51	M	36,39,33	Not Detected	36,35,32	Not Detected	2020-09-10
81	2010-01-040641	17	M	28,28,26	Not Detected	28,27,26	Not Detected	2020-09-10
82	2010-01-041534	24	M	35,33,30	Not Detected	27,27,28	Not Detected	2020-09-10
83	2010-01-050358	65	F	36,35,32	Not Detected	35,33,30	Detected	2020-09-10
84	2010-01-050982	60	M	28,27,26	Detected	35,33,30	Detected	2020-09-10
85	2010-01-050512	58	M	22,23,21	Detected	27,28,24	Detected	2020-09-10
86	2010-01-051002	48	F	27,28,24	Not Detected	21,16,18	Detected	2020-09-10
87	2010-01-051010	22	F	25,24,25	Detected	22,23,21	Detected	2020-09-10
88	2010-01-052078	50	M	36,34,33	Not Detected	27,28,24	Not Detected	2020-09-10
89	2010-01-050796	91	M	34,32,29	Not Detected	28,27,26	Not Detected	2020-09-10
90	2010-01-050266	60	M	29,29,25	Not Detected	28,28,26	Detected	2020-10-10
91	2010-01-050571	53	M	29,30,31	Not Detected	35,33,30	Not Detected	2020-10-10
92	2010-01-049972	81	M	21,16,18	Detected	35,33,30	Detected	2020-10-10
93	2010-01-049107	57	M	36,39,33	Not Detected	36,35,32	Not Detected	2020-10-10
94	2010-01-050157	63	F	28,28,26	Not Detected	28,27,26	Detected	2020-10-10
95	2010-01-050175	39	F	35,33,30	Not Detected	22,23,21	Not Detected	2020-10-10
96	2010-01-048793	21	F	36,35,32	Not Detected	22,23,21	Not Detected	2020-10-10
97	2010-01-052183	63	F	28,27,26	Not Detected	27,28,24	Detected	2020-10-10
98	2010-01-052172	31	F	22,23,21	Detected	28,27,26	Detected	2020-10-10
99	2010-01-052293	57	M	27,28,24	Not Detected	31,32,31	Detected	2020-10-10
100	2010-01-051688	70	M	25,24,25	Weak Positive	25,24,25	Detected	2020-10-10
